# Supplementary material for: Controlling the crystal structure of succinic acid via microfluidic spray-drying
Source: Royal Society of Chemistry journal article supplement (doi:10.1039/d2ra06380h), 2023-01-01
Supplement: d2ra06380h1.pdf [file d2ra06380h1.pdf]

## Controlling the crystal structure of succinic acid via microfluidic spray-drying

Aysu Ceren Okur,<sup>a</sup> Philipp Erni,<sup>b</sup> Lahoussine Ouali,<sup>b</sup> Daniel Benczedi,<sup>b</sup> and Esther Amstad<sup>\*a</sup>

<sup>a</sup> Soft Materials Laboratory, Institute of Materials, École Polytechnique Fédérale de Lausanne (EPFL), 1015 Lausanne, Switzerland

<sup>b</sup> Firmenich SA, Corporate R&D Division, PO Box 239, CH-1211 Geneva 8, Switzerland

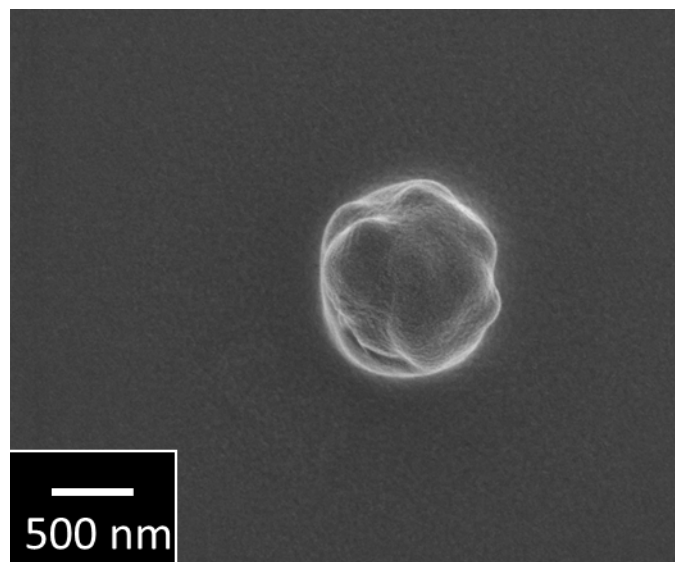

Figure S1. SEM image of a vanillin particle sprayed from an ethanol-based solution containing 20 mM vanillin

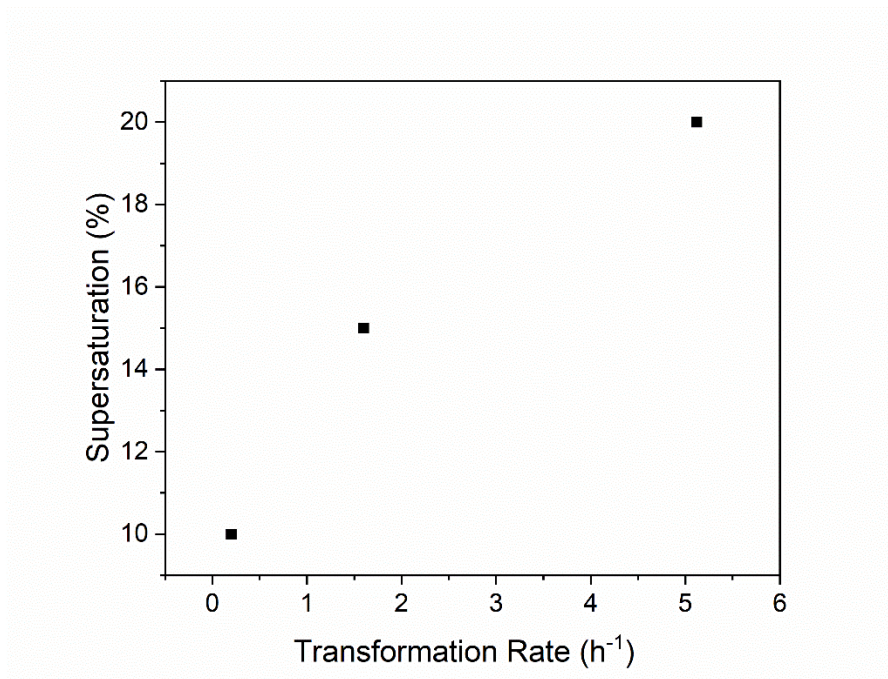

Figure S2. The influence of the degree of supersaturation of the initial solution on the transformation rate of spray-dried metastable succinic acid particles
